# Supplementary material for: Effects of Cationic Dendrimers and Their Complexes with microRNAs on Immunocompetent Cells
Source: MDPI journal article supplement (doi:10.3390/pharmaceutics15010148), 2022-12-31

# Supplementary Materials: Effects of Cationic Dendrimers and Their Complexes with microRNAs on Immunocompetent Cells

Nadezhda Knauer, Ekaterina Pashkina, Alina Aktanova, Olga Boeva, Valeria Arkhipova, Margarita Barkovskaya, Mariya Meschaninova, Andrii Karpus, Jean-Pierre Majoral, Vladimir Kozlov and Evgeny Apartsin

**Table S1.** Characteristics of donor groups under study.

| Experiment:                                            | N | M:F | Age (Mean $\pm$ SD) |
|--------------------------------------------------------|---|-----|---------------------|
| WST assay:                                             |   |     |                     |
| AE2G3                                                  | 6 | 3:3 | 25.7 $\pm$ 1.6      |
| AE2G3/miR                                              | 5 | 3:2 | 25.0 $\pm$ 0.0      |
| BDEF33                                                 | 5 | 1:4 | 37.2 $\pm$ 13.0     |
| BDEF33/miR                                             | 8 | 3:5 | 25.3 $\pm$ 1.7      |
| Apoptosis assay                                        | 6 | 2:4 | 29.0 $\pm$ 7.5      |
| LDH assay                                              | 5 | 2:3 | 41.6 $\pm$ 21.5     |
| Internalization                                        | 6 | 3:3 | 31.7 $\pm$ 9.9      |
| Cells proliferation (CFSE-assay) and activation status | 6 | 2:4 | 38.5 $\pm$ 20.9     |
| Perforin and granzyme B production                     | 6 | 2:4 | 27.5 $\pm$ 7.0      |
| Cytokine secretion                                     | 5 | 1:4 | 41.2 $\pm$ 21.9     |

**Figure S1.** Microscopy images of cells treated with dendrimers, microRNA and dendriplexes. Magnification **400x**.

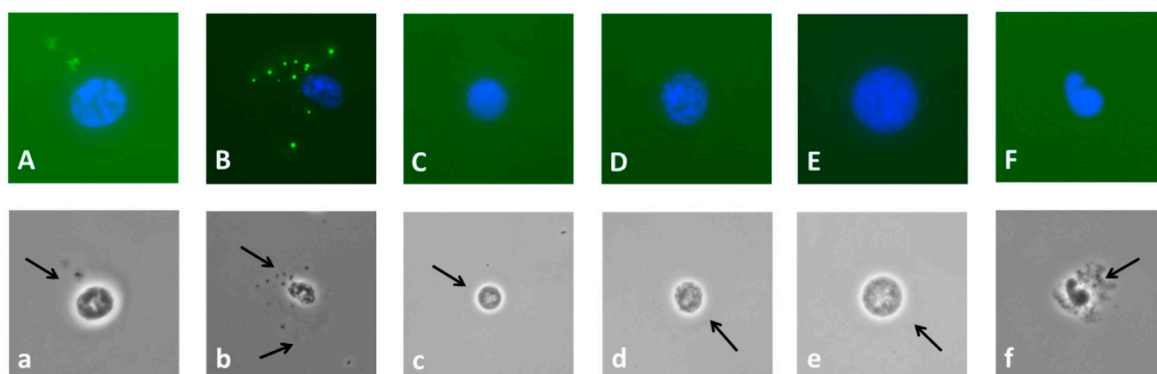

**Note:** Upper cases (**A-F**) represent merged fluorescent images on the magnitude X1000. The green spots represent FAM-labeled miRNAs and the nucleus is stained with DAPI (blue). AE2G3 in complex with miR155 (**A**) and BDEF33 in complex with miR155 (**B**) represent cellular uptake of labeled dendrimers complexes; while non-labeled dendrimers AE2G3 (**C**) and BDEF33 (**D**) as well as miR155 alone (**E**) didn't differ from the negative control (**F**). Lower cases (**a-f**) represent the correspondent phase-contrast images on the magnitude X400 where the cytoplasm is indicated by arrows.

**Figure S2.** Evaluation of proper toxic effects of cationic carbosilane (BDEF33) and phosphorus (AE2G3) dendrimers of the third generation on PBMCs viability in comparison with non-treated control cells (NTC). Mann-Whitney test was used. Letters mark significant differences ( $p < 0.05$ ): "a" – in comparison with NTC, "b" – in comparison with treatment in concentration 0.3  $\mu\text{M}$ , "c" – in comparison with treatment in concentration 1  $\mu\text{M}$ , "d" – in comparison with treatment in concentration 3  $\mu\text{M}$ , "e" – in comparison with treatment in concentration 10  $\mu\text{M}$ , "f" – in comparison with treatment in concentration 30  $\mu\text{M}$ . Bar show the significant difference between two variants of complexes.

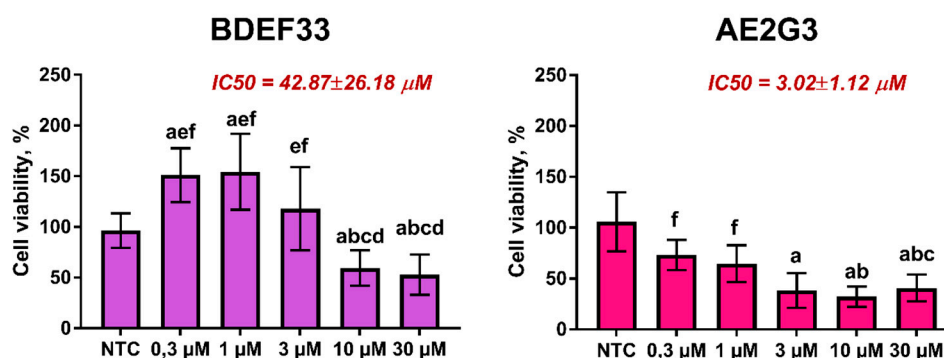

For both dendrimers dose-dependent toxic effect was observed for medium and high concentrations. Interestingly, cell viability was increased in comparison with NTC after treatment by BDEF33 in smaller concentrations – 0.3  $\mu\text{M}$  ( $p=0.009$ ) and 1  $\mu\text{M}$  ( $p=0.021$ ). For AE2G3 cell viability curve looks more plane.

AE2G3 was found to be more toxic for PBMCs as BDEF33 being taken in low and medium concentrations 0.3  $\mu\text{M}$  ( $p=0.005$ ), 1  $\mu\text{M}$  ( $p=0.0076$ ), 3  $\mu\text{M}$  ( $p=0.007$ ). These data also correlate with the values of  $IC_{50}$  for the dendrimers:  $IC_{50}$  of AE2G3 is much lower ( $3.02 \pm 1.12 \mu\text{M}$ ) than  $IC_{50}$  of BDEF33 ( $42.87 \pm 26.8 \mu\text{M}$ ).

**Figure S3.** Evaluation of dendriplexes toxicity in comparison with non-treated control (NTC) and mock control (free dendrimer in the highest concentration being used – 1,31  $\mu$ M for BDEF33 and 0.66  $\mu$ M for AE2G3). Mann-Whitney test was used.

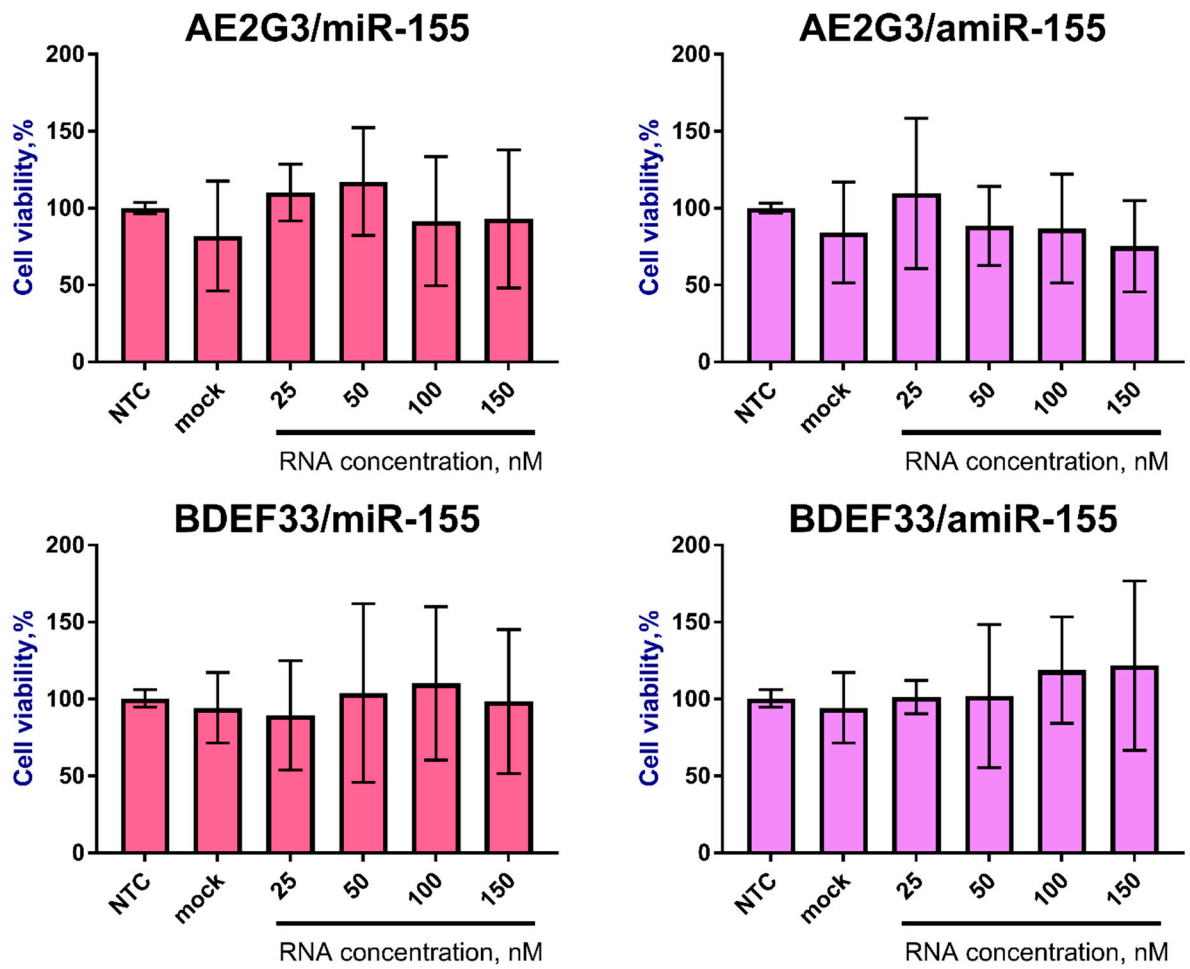

**Figure S4.** Evaluation of LDH activity after dendriplexes treatment (10 min, 20 min) in comparison with non-treated control (NTC), free miRs and free dendrimers. Mann-Whitney test was used. Letters mark significant differences ( $p < 0.05$ ) between groups: "a" – in comparison with NTC; "b" – in comparison with a free dendrimer; "c" – in comparison with a free miR; "d" – in comparison with similar BDEF33-based complex; "e" – in comparison with similar AE2G3-based complex. Bars show the significant differences between columns in the subgroups.

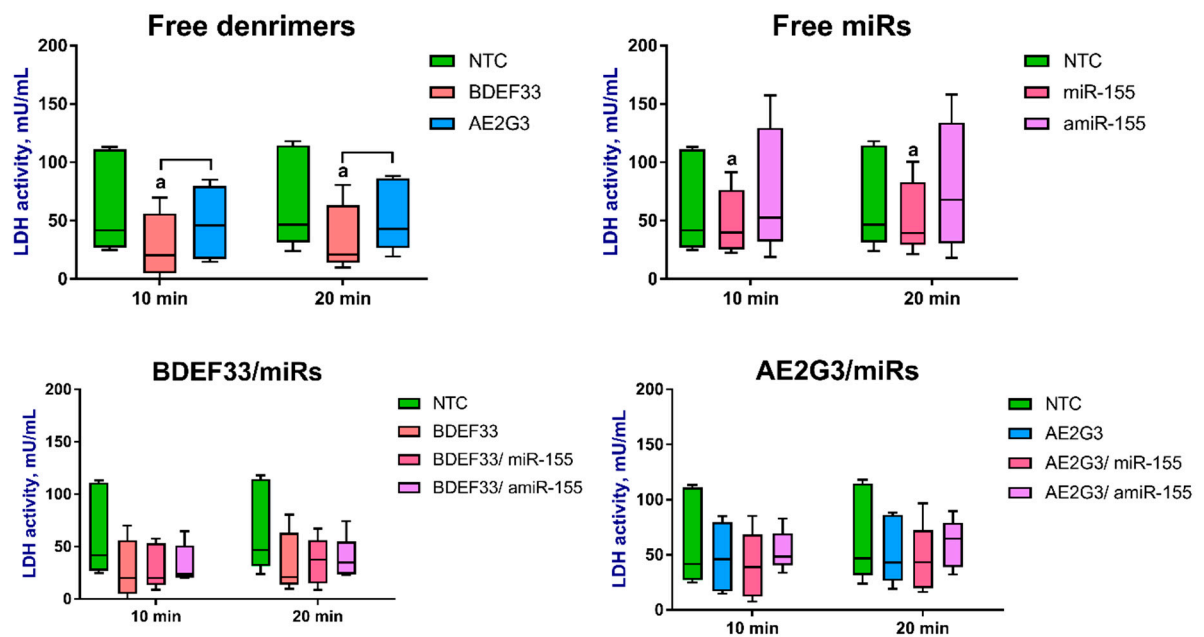

**Figure S5.** Evaluation of apoptosis parameters in CD4+ and CD8+ subsets after treatment by free dendrimers, free miRs or dendriplexes in comparison with non-treated control (NTC). Mann-Whitney test was used.

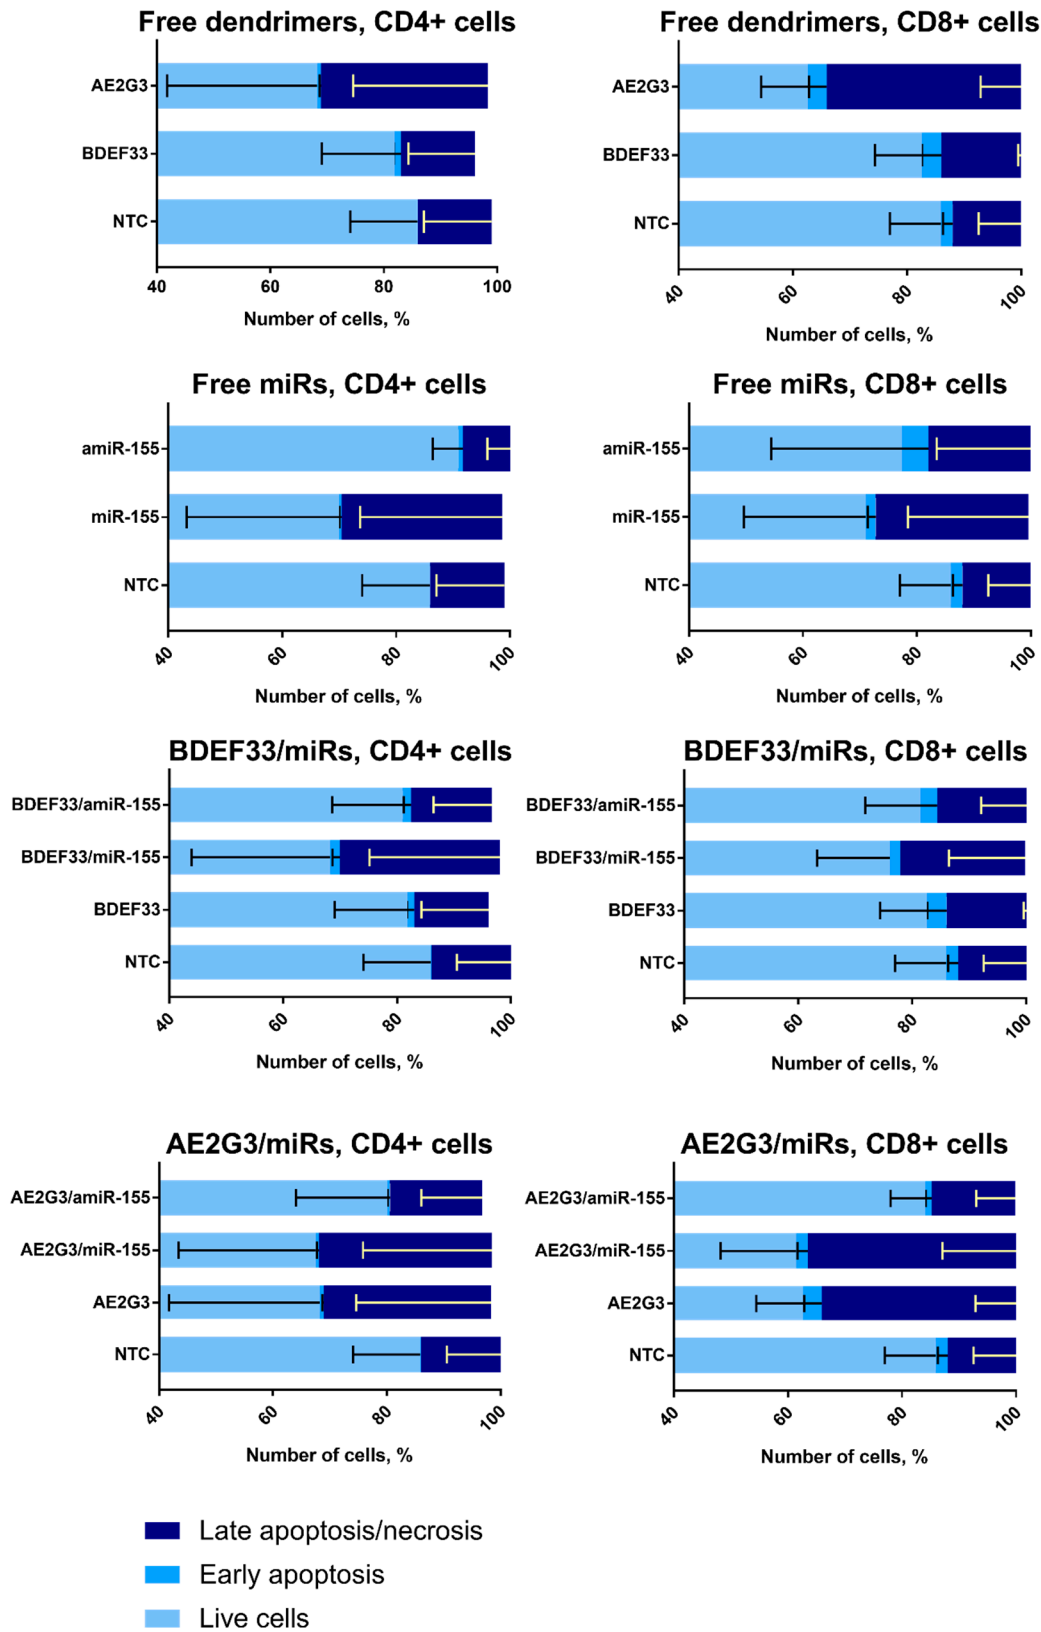

**Figure S6.** Evaluation of subsets percentage after the treatment by dendriplexes or their components (72 h): CD3<sup>+</sup>, CD4<sup>+</sup>, CD8<sup>+</sup>. Mann-Whitney test was used.

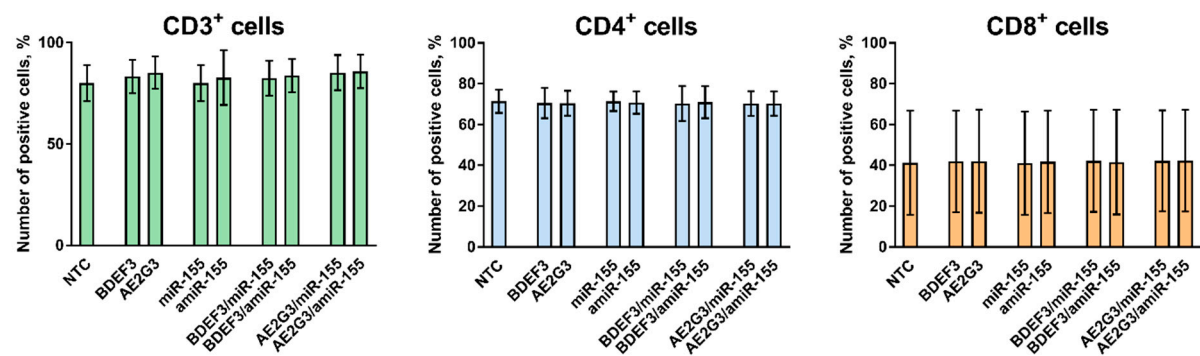

**Figure S7.** Evaluation of T-cells subsets proliferation after the treatment by dendriplexes or their components (72 h). Mann-Whitney test was used.

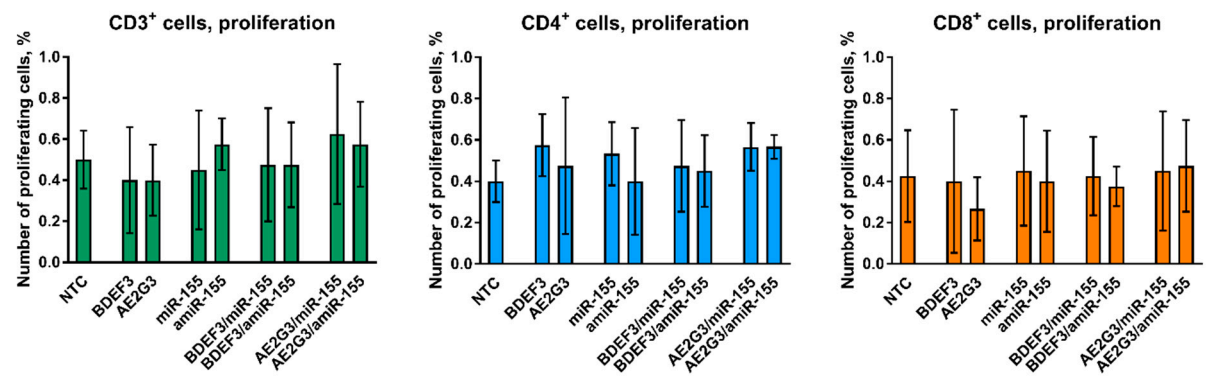



**Figure S8.** Evaluation of expression of CD25 activation marker on CD4+ and CD8+ T-lymphocytes after 72 h of treatment by dendriplexes or their complexes. Mann-Whitney test was used. Letters mark significant differences ( $p < 0.05$ ): "a" – in comparison with NTC, "b" – in comparison with treatment by free dendrimer, "c" – in comparison with treatment by free miR, "d" – in comparison with treatment by BDEF33-based complex, "e" – in comparison with by AE2G3-based complex.

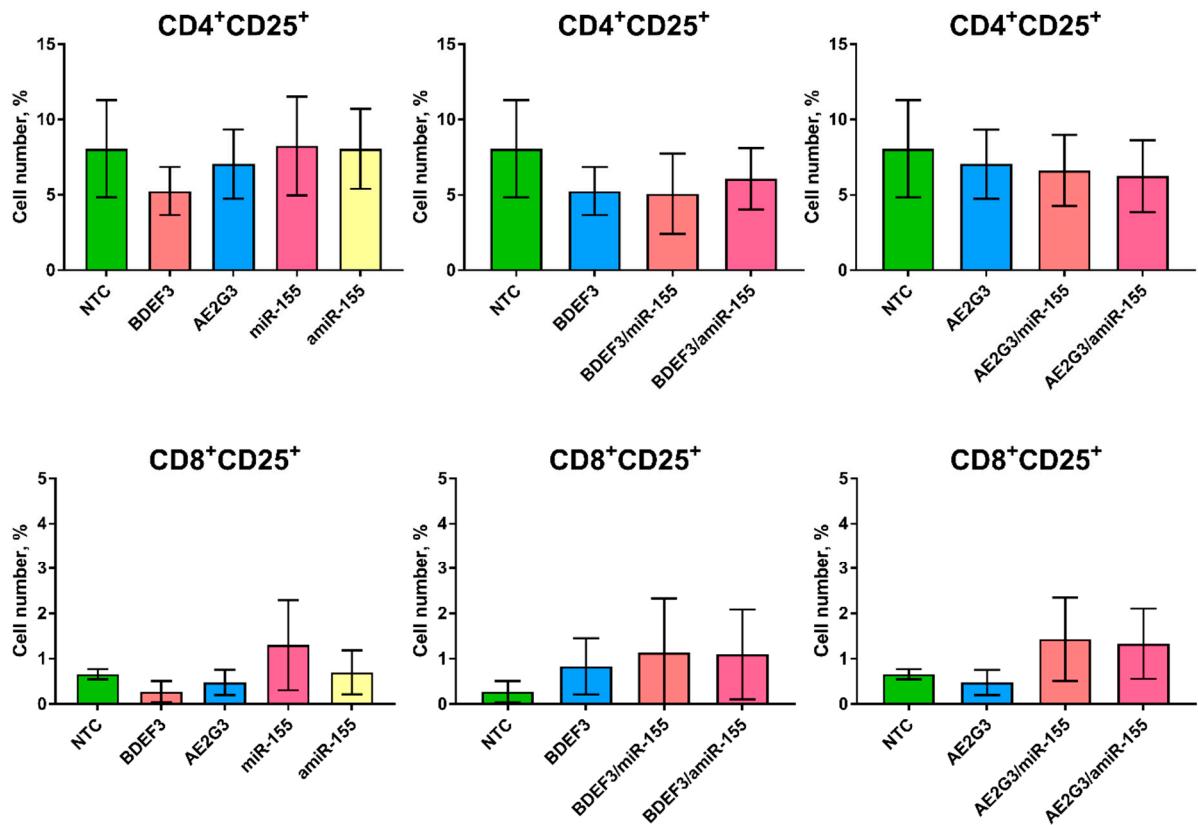

**Figure S9.** Evaluation of expression of granzyme B (GrzB) and perforin (Perf) by cytotoxic CD8<sup>+</sup> T-lymphocytes and NK-cells (CD16<sup>+</sup>CD56<sup>+</sup>) after treatment by dendriplexes or their components. Mann-Whitney test was used.

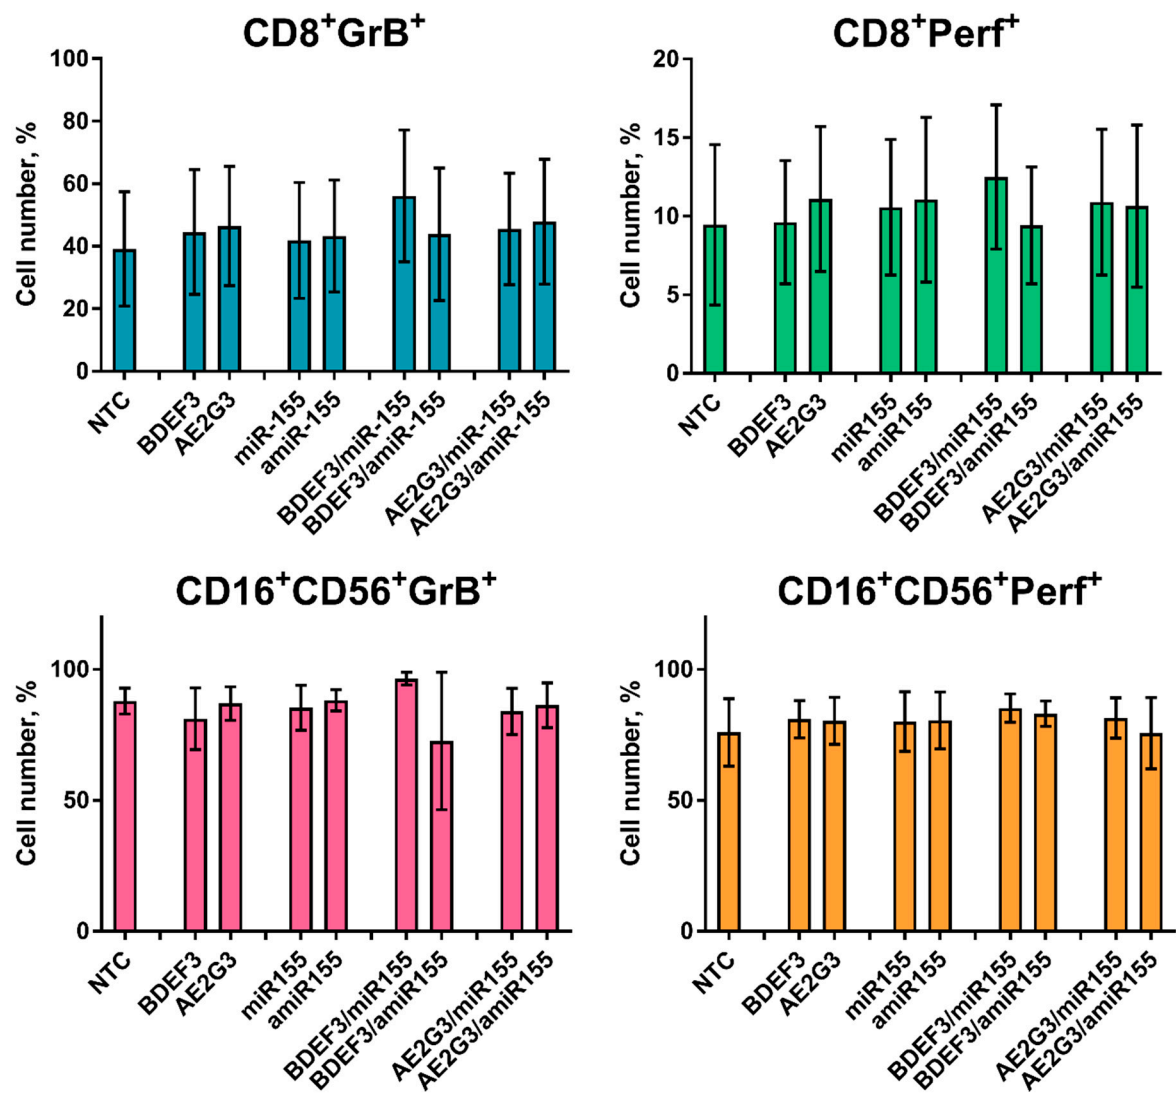

Supplement: s1 [file s1]
